# Supplementary material for: Estimation of baboon daily travel distances by means of point sampling &#8211; the magnitude of underestimation
Source: Copernicus journal article supplement (doi:10.5194/pb-4-143-2017), 2017-07-10
Supplement: Supplementary file 1 [file pb-4-143-2017-supplement.zip]

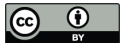

## *Supplement of*

# **Estimation of baboon daily travel distances by means of point sampling – the magnitude of underestimation**

**Holger Sennhenn-Reulen et al.**

*Correspondence to:* Dietmar Zinner (dzinner@gwdg.de)

- pb-4-143-2017-supplement-title-page.pdf
- Sennhenn-Reulen\_Supplement\_S1\_S2.docx
- Sennhenn-Reulen\_Supplement\_S3.xlsx

The copyright of individual parts of the supplement might differ from the CC BY 3.0 License.
